# Supplementary material for: Crystal-to-crystal structural transformation of hydrogen-bonding molecular crystals of (imidazolium)(3-hydroxy-2-quinoxalinecarboxylate) through H2O adsorption–desorption
Source: Royal Society of Chemistry journal article supplement (doi:10.1039/c4ce02519a), 2015-01-01
Supplement: c4ce02519a1.pdf [file c4ce02519a1.pdf]

## Supporting Information

# Crystal-to-Crystal Structural Transformation of Hydrogen-Bonding Molecular Crystals of (Imidazolium)(3-Hydroxy-2- quinoxalinecarboxylate) through H<sub>2</sub>O Adsorption–Desorption

Yuya Yoshii, Ken-ichi Sakai, Norihisa Hoshino, Takashi Takeda, Shin-ichiro Noro, Takayoshi Nakamura, and Tomoyuki Akutagawa

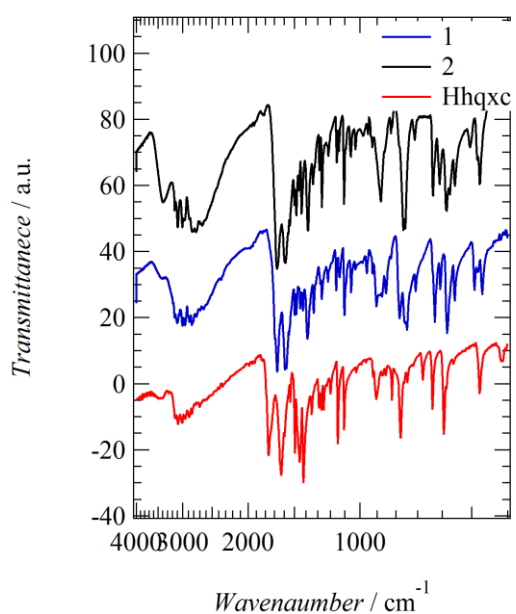

**Figure S1.** IR spectra of crystals **1** and **2** together with Hqxc on KBr pellets.

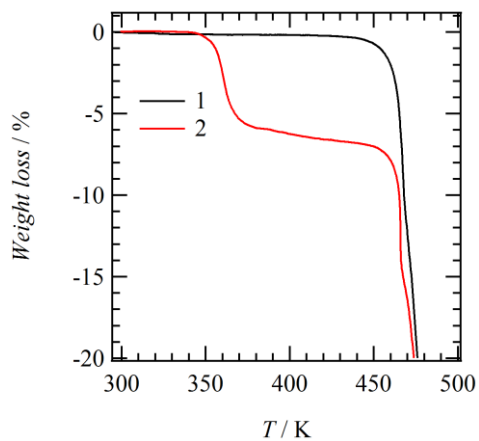

**Figure S2.** TG diagram of crystals **1** and **2**.

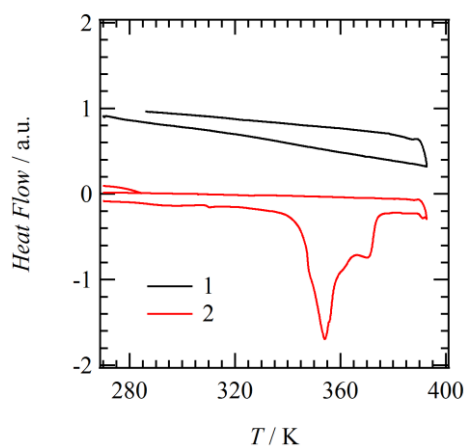

**Figure S3.** DSC diagram of crystals **1** and **2**.

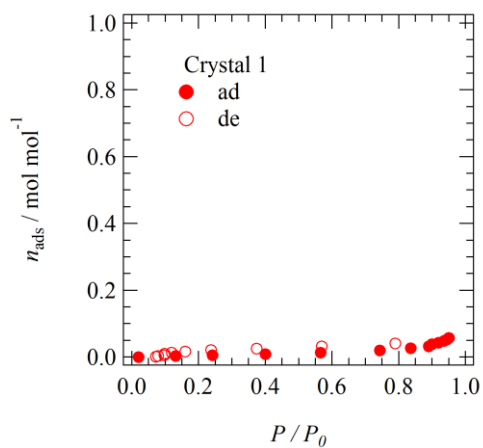

**Figure S4.** The adsorption-desorption isotherms of H<sub>2</sub>O molecule in crystal **1** at 323 K. The number of H<sub>2</sub>O molecules per (HIm<sup>+</sup>)(hqxc<sup>-</sup>) unit ( $n_{\text{ads}}$ ) vs. relative pressure ( $P / P_0$ ) of H<sub>2</sub>O molecules.

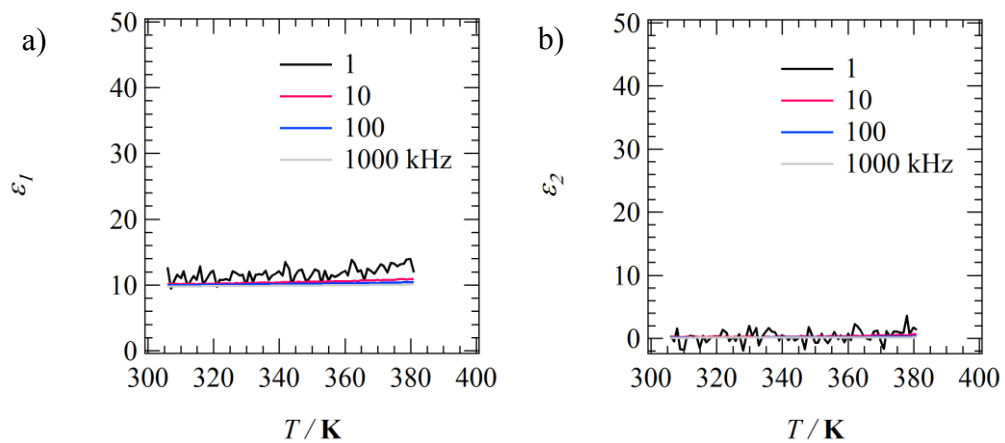

**Figure S5.** Temperature- and frequency-dependent a) real part  $\epsilon_1$  and b) imaginary part  $\epsilon_2$  of compressed pellet of crystal **1**.

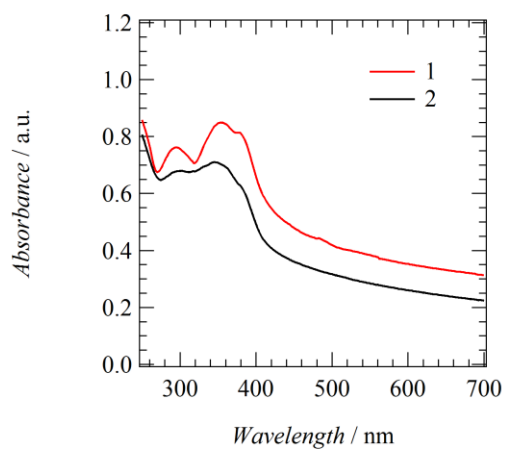

**Figure S6.** Solid state UV-vis spectra of crystals **1** and **2** on KBr pellets.

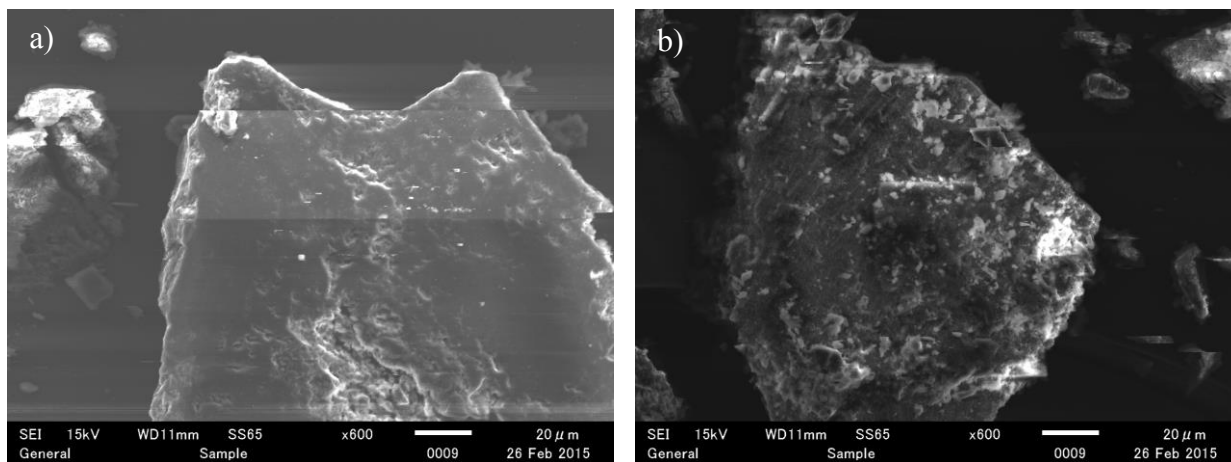

**Figure S7.** SEM images of grid crystal a) **1** and b) **2**. Both crystals were hold at 20 min at 373 K. Scale bar was 20  $\mu\text{m}$ . The crystallinity of **1** was higher than that of crystal **2** after the thermal treatment at 373 K. Fine crystallites of unhydrated **2** were observed in Figure S7b.

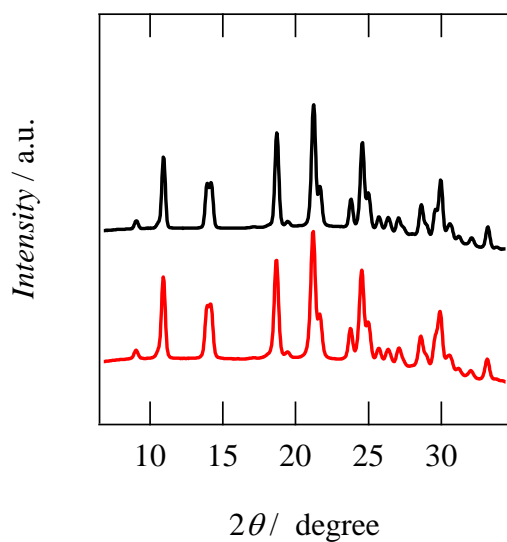

**Figure S8.** XRD profiles crystal **1**. The initial state of unhydrated **1** (red) and after the exposure to H<sub>2</sub>O at 313 K. There was no changes in the XRD patterns, suggesting no structural transformation through the H<sub>2</sub>O adsorption of crystals **1**.
